# Supplementary material for: Screening of Carbapenemase-producing organisms and Vancomycin Resistant Enterococci by a molecular approach: impact and lessons learned
Source: Research Square preprint supplement (doi:10.21203/rs.3.rs-5919914/v1), 2025-02-04
Supplement: Supplementary file 1 [file af733ef5829e20252d91e1aa.docx]

**SUPPLEMENTARY MATERIAL**

**Material and methods**

**Statistics**

Mean of turnaround time for eXDR positive detection by culture in our hospital was 2.6 days (standard deviation=0.7). This study was designed to detect an absolute difference of 1 day in the turnaround time for eXDR positive detection (mean of 2.6 days actually versus 1.6 days with BD solution) with a=0.05 and b=0.1 (power of 90%). The minimal number of evaluable patients required in each study group was 22 positive patients. Based on estimates of the number of positive cases over the past 3 years, a 12-month period (2x6 months) will achieve the 44 positive cases required.

**Results**

*Table S1: Screening number used to detect an eXDR for the first time*

| Phase 1 | | | | | |
| --- | --- | --- | --- | --- | --- |
| Reason for screening | 1st positive sample | 2nd positive sample | 3rd positive sample | 4th positive sample | 5th positive sample |
| History of hospitalization abroad | 10 | 1 |  |  |  |
| eXDR carriers |  |  |  |  |  |
| Hospitalization at least one time (>24h) within the previous year | 1 |  |  |  |  |
| Transfer from another hospital |  | 2 |  |  |  |
| Transfer from nursing home |  |  |  |  |  |
| Contact patients |  | 1 |  |  | 1 |
| Total n (%) | 11 (68,75%) | 4 (25%) | 0 | 0 | 1 (6,25%) |
| Phase 2 | | | | | |
| Reason for screening | 1st positive sample | 2nd positive sample | 3rd positive sample | 4th positive sample | 5th positive sample |
| History of hospitalization abroad | 7 | 1 |  |  |  |
| eXDR carriers | 2 |  |  |  |  |
| Hospitalization at least one time (>24h) within the previous year | 2 | 2 | 1 |  |  |
| Transfer from another hospital | 4 | 1 |  |  |  |
| Transfer from nursing home | 1 |  |  |  |  |
| Contact patients | 1 | 1 | 1 |  | 1 |
| Total n (%) | 17 (68%) | 5 (20%) | 2 (8%) | 0 | 1 (4%) |

Table S2. Adjustment of the turnaround time between sampling and transmission of results to the infection control unit/clinician according to age, sex and Charlson index – n = 31

| Turaround time | Coefficient | p-value | [95% Conf. Interval] | |
| --- | --- | --- | --- | --- |
| Phase |  |  |  |  |
| Phase 2 | -26.809 | 0.004 | -43.977 | -9.641 |
| Gender |  |  |  |  |
| Male | -10.239 | 0.199 | -26.213 | 5.734 |
| Age | 0.198 | 0.431 | -0.311 | 0.707 |
| Charlson index | 0.881 | 0.682 | -3.484 | 5.246 |
| Constant | 47.577 | 0.004 | 16.223 | 78.932 |

Table S3. Total number of contact patients

|  | Phase 1:  before PCR  implementation | Phase 2:  after PCR  implementation | p-value |
| --- | --- | --- | --- |
| Stays of known positive patient | n = 6 | n = 11 |  |
| Number of contact cases, median [IQR] | 10.0 [0.0-25.0] | 0.0 [0.0-0.0] | .092 |
| Number of contact cases, n (%) |  |  |  |
| - 0 | 3 (50%) | 9 (81.8%) |  |
| - 6 | 0 (0%) | 1 (9.1%) |  |
| - 17 | 0 (0%) | 1 (9.1%) |  |
| - 20 | 1 (16.7%) | 0 (0%) |  |
| - 25 | 1 (16.7%) | 0 (0%) |  |
| - 41 | 1 (16.7%) | 0 (0%) |  |
| Stays of new patients discovered positive during the study | n = 21 | n = 29 |  |
| Number of contact cases, median [IQR] | 29.0 [0.0-46.0] | 12.0 [0.0-35.0] | .298 |
| Number of contact cases, n (%) |  |  |  |
| - 0 | 6 (28.6%) | 13 (44.8%) |  |
| - 2 | 1 (4.8%) | 0 (0%) |  |
| - 3 | 0 (0%) | 1 (3.5%) |  |
| - 8 | 1 (4.8%) | 0 (0%) |  |
| - 12 | 0 (0%) | 1 (3.5%) |  |
| - 16 | 1 (4.8%) | 0 (0%) |  |
| - 19 | 0 (0%) | 1 (3.5%) |  |
| - 22 | 0 (0%) | 1 (3.5%) |  |
| - 23 | 0 (0%) | 2 (6.9%) |  |
| - 24 | 1 (4.8%) | 0 (0%) |  |
| - 28 | 0 (0%) | 1 (3.5%) |  |
| - 29 | 1 (4.8%) | 0 (0%) |  |
| - 30 | 1 (4.8%) | 0 (0%) |  |
| - 34 | 1 (4.8%) | 1 (3.5%) |  |
| - 35 | 0 (0%) | 1 (3.5%) |  |
| - 38 | 1 (4.8%) | 0 (0%) |  |
| - 41 | 1 (4.8%) | 0 (0%) |  |
| - 42 | 0 (0%) | 1 (3.5%) |  |
| - 46 | 1 (4.8%) | 0 (0%) |  |
| - 47 | 0 (0%) | 1 (3.5%) |  |
| - 48 | 1 (4.8%) | 0 (0%) |  |
| - 54 | 1 (4.8%) | 0 (0%) |  |
| - 55 | 1 (4.8%) | 1 (3.5%) |  |
| - 63 | 0 (0%) | 1 (3.5%) |  |
| - 64 | 0 (0%) | 2 (6.9%) |  |
| - 70 | 1 (4.8%) | 0 (0%) |  |
| - 77 | 1 (4.8%) | 0 (0%) |  |
| - 92 | 0 (0%) | 1 (3.5%) |  |
| Stays of new patients discovered positive during the study and sampled within 48 hours of hospital admission | n = 15 | n = 23 |  |
| Number of contact cases, median [IQR] | 30 [8-48] | 0 [0-23] |  |
| Number of contact cases, n (%) |  |  |  |
| - 0 | 2 (13.3%) | 12 (52.2%) |  |
| - 2 | 1 (6.7%) | 0 (0%) |  |
| - 3 | 0 (0%) | 1 (4.4%) |  |
| - 8 | 1 (6.7%) | 0 (0%) |  |
| - 12 | 0 (0%) | 1 (4.4%) |  |
| - 16 | 1 (6.7%) | 0 (0%) |  |
| - 19 | 0 (0%) | 1 (4.4%) |  |
| - 22 | 0 (0%) | 1 (4.4%) |  |
| - 23 | 0 (0%) | 2 (8.7%) |  |
| - 24 | 1 (6.7%) | 0 (0%) |  |
| - 28 | 0 (0%) | 1 (4.4%) |  |
| - 29 | 1 (6.7%) | 0 (0%) |  |
| - 30 | 1 (6.7%) | 0 (0%) |  |
| - 34 | 1 (6.7%) | 0 (0%) |  |
| - 35 | 0 (0%) | 1 (4.4%) |  |
| - 38 | 1 (6.7%) | 0 (0%) |  |
| - 42 | 0 (0%) | 1 (4.4%) |  |
| - 46 | 1 (6.7%) | 0 (0%) |  |
| - 47 | 0 (0%) | 1 (4.4%) |  |
| - 48 | 1 (6.7%) | 0 (0%) |  |
| - 54 | 1 (6.7%) | 0 (0%) |  |
| - 63 | 0 (0%) | 1 (4.4%) |  |
| - 70 | 1 (6.7%) | 0 (0%) |  |
| - 77 | 1 (6.7%) | 0 (0%) |  |
| Stays of new patients discovered positive during the study and **not sampled** within 48 hours of hospital admission | n = 6 | n = 6 |  |
| Number of contact cases, median [IQR] | 0 [0-41] | 59.5 [34-64] |  |
| Number of contact cases, n (%) |  |  |  |
| - 0 | 4 (66.7%) | 1 (16.7%) |  |
| - 34 | 0 (0%) | 1 (16.7%) |  |
| - 41 | 1 (16.7%) | 0 (0%) |  |
| - 55 | 1 (16.7%) | 1 (16.7%) |  |
| - 64 | 0 (0%) | 2 (33.3%) |  |
| - 92 | 0 (0%) | 1 (16.7%) |  |

Table S4. Unit costs and sources from the hospital's point of view

| **Resource** | **Unit costs** | **Unit** | **Source** |
| --- | --- | --- | --- |
|  |  |  |  |
| **Hospitalization** | --- | Per stay | ENCC data1 |
| **Biology test** *(in addition to the hospital stay)* |  |  |  |
| VRE PCR3 | €43.48 | Per test | 2023 Purchase price4 |
| CPO PCR3 | €31.03 | Per test | 2023 Purchase price4 |

1 national study of common costs - production cost

3Conventional PCR or qualitative multiplex real-time PCR for < 10 primer pairs (DNA/RNA)

42023 uniHA market (cooperative of French public hospital purchasers)

Table S5. Unit costs and sources from the point of view of the French National Health Insurance

| **Resource** | **Unit costs** | **Unit** | **Source** |
| --- | --- | --- | --- |
|  |  |  |  |
| **Hospitalization** | --- | Per stay | PMSI 1 |
| **Biology test** *(in addition to the hospital stay)* |  |  |  |
| VRE PCR | €54 | Per test | MERRI G03 grant2 |
| CPO PCR | €54 | Per test | RIHN N131, MERRI G03 grant 2 |

1 national medico-administrative database

2https://solidarites-sante.gouv.fr/systeme-de-sante-et-medico-social/recherche-et-innovation/rihn
